# Supplementary material for: Role and mechanism of PVN–sympathetic–adipose circuit in depression and insulin resistance induced by chronic stress
Source: PubMed Central journal article supplement — EMBO Rep. 2023 Oct 23;24(12):e57176. doi: 10.15252/embr.202357176 (PMC10702843; doi:10.15252/embr.202357176), 2023-10-23

## Expanded View Figures

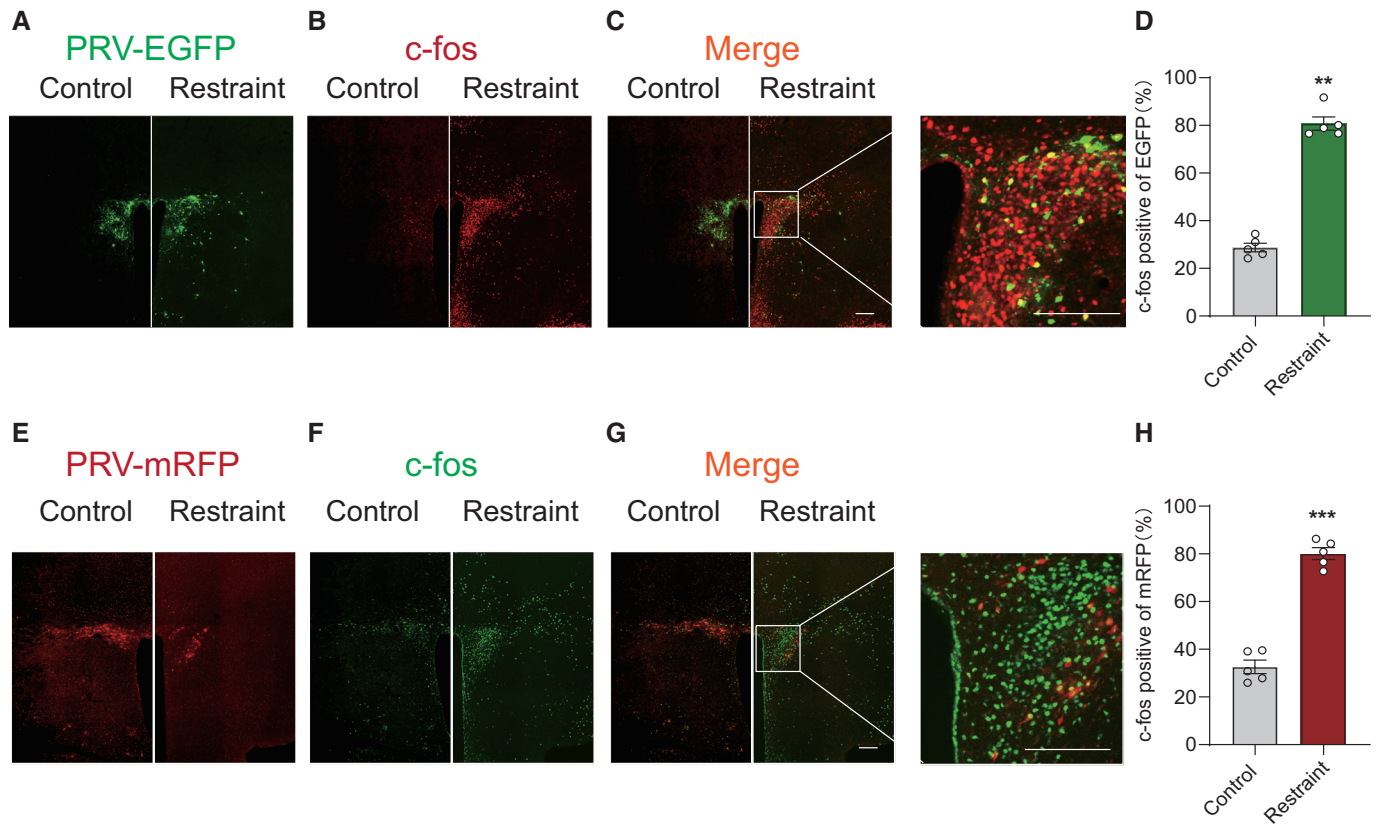

**Figure EV1. PVN neurons traced by pseudorabies virus are activated under restraint stress.**

A–H Representative images showing PVN neurons traced by PRV-EGFP from iWAT (A, C, C', green) were activated by restraint stress (B, C, C', red) on the 4<sup>th</sup> day after injection. (D) The percentage of colocalization of PRV-EGFP and c-Fos, Mann–Whitney *U*-test,  $P = 0.0079$ . Representative images showing PVN neurons traced by PRV-mRFP from eWAT (E, G, G', red) were activated by restraint stress (F, G, G', green). (H) The percentage of colocalization of PRV-mRFP and c-Fos, two-tailed unpaired *t*-test,  $t_{(8)} = 12.61$ ,  $P < 0.0001$ . Control group  $n = 5$ , restraint group  $n = 5$  in (D) and (H). Shapiro–Wilk test and *F*-test were used to test the normality and equal variance assumptions, respectively. Two-tailed *t*-tests were performed to assess differences between two experimental groups with normally distributed data and equal variance. Two-tailed *t*-tests with Welch's correction were used when a two-sample comparison of means with unequal variances. For non-normally distributed data, Mann–Whitney *U*-tests were performed to compare two groups.  $P < 0.05$  was considered statistically significant. \*\* $P < 0.01$ , \*\*\* $P < 0.001$ . Data are presented as means  $\pm$  SEM. Scale bar: A–C and E–G, 200  $\mu$ m.

Source data are available online for this figure.

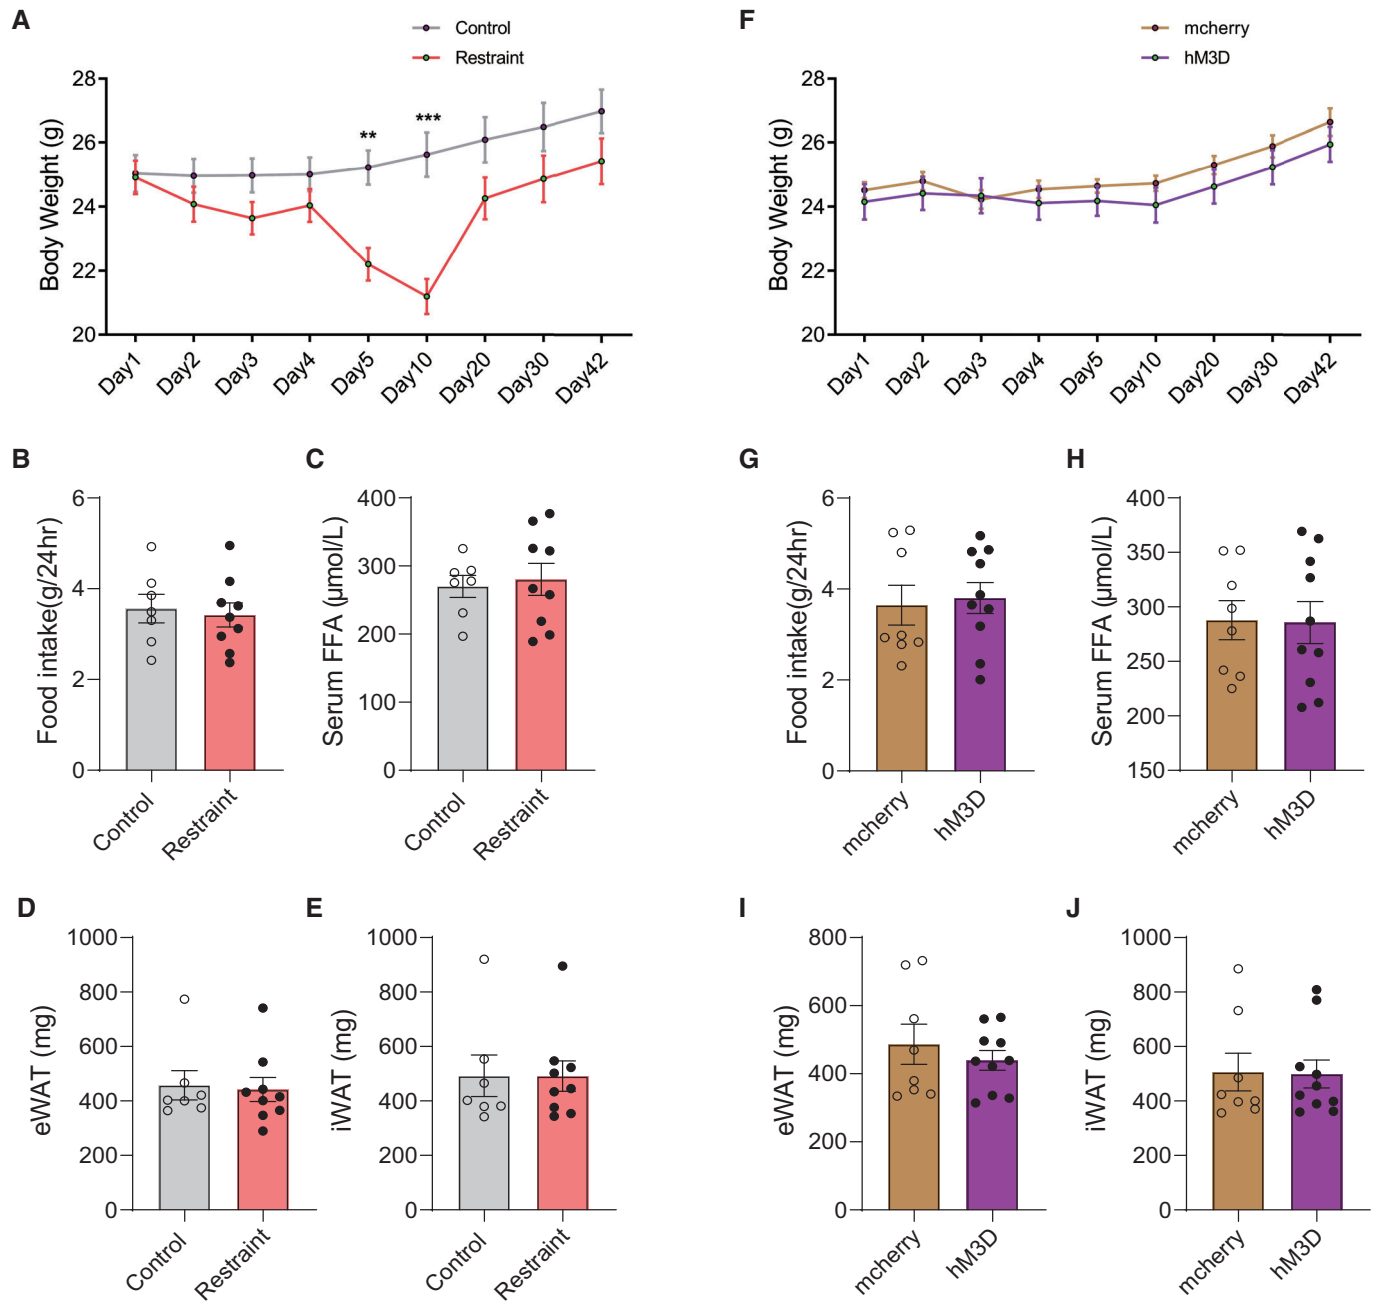

Figure EV2.

**Figure EV2. Body weight, fat weight, food intake and serum FFA level under chronic restraint stress and PVN activation paradigms.**

- A The body weight of mice during chronic restraint paradigms. subgroups,  $F_{(1, 14)} = 4.414$ ,  $P = 0.0542$ ; time,  $F_{(8, 112)} = 52.15$ ,  $P < 0.0001$ ; subgroups  $\times$  time,  $F_{(8, 112)} = 26.58$ ,  $P < 0.0001$ .
- B The amount of accumulative of 24-h food intake after chronic restraint treatment. two-tailed unpaired  $t$ -test,  $t_{(14)} = 0.3420$ ,  $P = 0.7374$ .
- C The serum FFA level after chronic restraint treatment. two-tailed unpaired  $t$ -test,  $t_{(14)} = 0.3358$ ,  $P = 0.7420$ .
- D–F The mass of eWAT (D, Mann–Whitney  $U$ -test,  $P = 0.9182$ ) and iWAT (E, Mann–Whitney  $U$ -test,  $P > 0.9999$ ) after chronic restraint treatment. F. the body weight of mice during chronic PVN activation. subgroups,  $F_{(1, 16)} = 0.5661$ ,  $P = 0.4627$ ; time,  $F_{(8, 128)} = 51.72$ ,  $P < 0.0001$ ; subgroups  $\times$  time,  $F_{(8, 128)} = 1.772$ ,  $P = 0.0883$ .
- G The amount of accumulative of 24-h food intake after chronically reactivating PVN neurons. Mann–Whitney  $U$ -test,  $P = 0.7618$ .
- H The serum FFA level after chronically reactivating PVN neurons. two-tailed unpaired  $t$ -test,  $t_{(16)} = 0.08091$ ,  $P = 0.9365$ .
- I, J The mass of eWAT (I, two-tailed unpaired  $t$ -test,  $t_{(16)} = 0.7674$ ,  $P = 0.4540$ ) and iWAT (J, Mann–Whitney  $U$ -test,  $P = 0.8968$ ) after chronic restraint treatment.

Data information: Control group  $n = 7$ , restraint group  $n = 9$  in (A–E); mcherry group  $n = 8$ , hM3D group  $n = 10$  in (F–J). Shapiro–Wilk test and  $F$ -test were used to test the normality and equal variance assumptions, respectively. Two-tailed  $t$ -tests were performed to assess differences between two experimental groups with normally distributed data and equal variance. Two-tailed  $t$ -tests with Welch's correction were used when a two-sample comparison of means with unequal variances. For non-normally distributed data, Mann–Whitney  $U$ -tests were performed to compare two groups. For multiple groups, two-way ANOVAs followed by Sidak multiple comparisons test were used.  $P < 0.05$  was considered statistically significant.  $**P < 0.01$ ,  $***P < 0.001$ . Data are presented as means  $\pm$  SEM. Source data are available online for this figure.

**Figure EV3. Chronic activation of the PV neurons responding to restraint stress did not affect sympathetic innervation in WAT.**

- A Photomicrograph illustrating the PRV-mRFP labelling in the hypothalamus 6 days after PRV-mRFP injected into eWAT; arrow pointed to the DMH traced by PRV-mRFP.
- B c-Fos staining after 2 h restraint in the same brain slice.
- C, C' Low and high magnification of the photomicrograph illustrating single c-Fos immunolabelling (green) without PRV-mRFP labelling (red) in the paraventricular thalamic nucleus (PV).
- D Photomicrograph illustrating the PRV-EGFP labelling in the hypothalamus 6 days after PRV-EGFP injected into iWAT; arrow pointed to the DMH traced by PRV-EGFP.
- E c-Fos staining after 2 h restraint in the same brain slice.
- F, F' Low and high magnification of the photomicrograph illustrating single c-Fos immunolabelling (red) without PRV-EGFP labelling (green) in the PV.
- G, H Mcherry and hM3D-mcherry expression in PV.
- I–L Immunohistochemical staining of TH in iWAT and eWAT (I and K). Statistical analysis of the histological data of iWAT and eWAT (J and L).

Data information: mcherry group  $n = 6$ , hM3D group  $n = 6$  in (I–L). Shapiro–Wilk test and  $F$ -test were used to test the normality and equal variance assumptions, respectively. Two-tailed  $t$ -tests were performed to assess differences between two experimental groups with normally distributed data and equal variance. Two-tailed  $t$ -tests with Welch's correction were used when a two-sample comparison of means with unequal variances. For non-normally distributed data, Mann–Whitney  $U$ -tests were performed to compare two groups.  $P < 0.05$  was considered statistically significant. Data are presented as means  $\pm$  SEM. Scale bar: A–H, 200  $\mu\text{m}$ ; I and K, 2,000  $\mu\text{m}$ . Source data are available online for this figure.

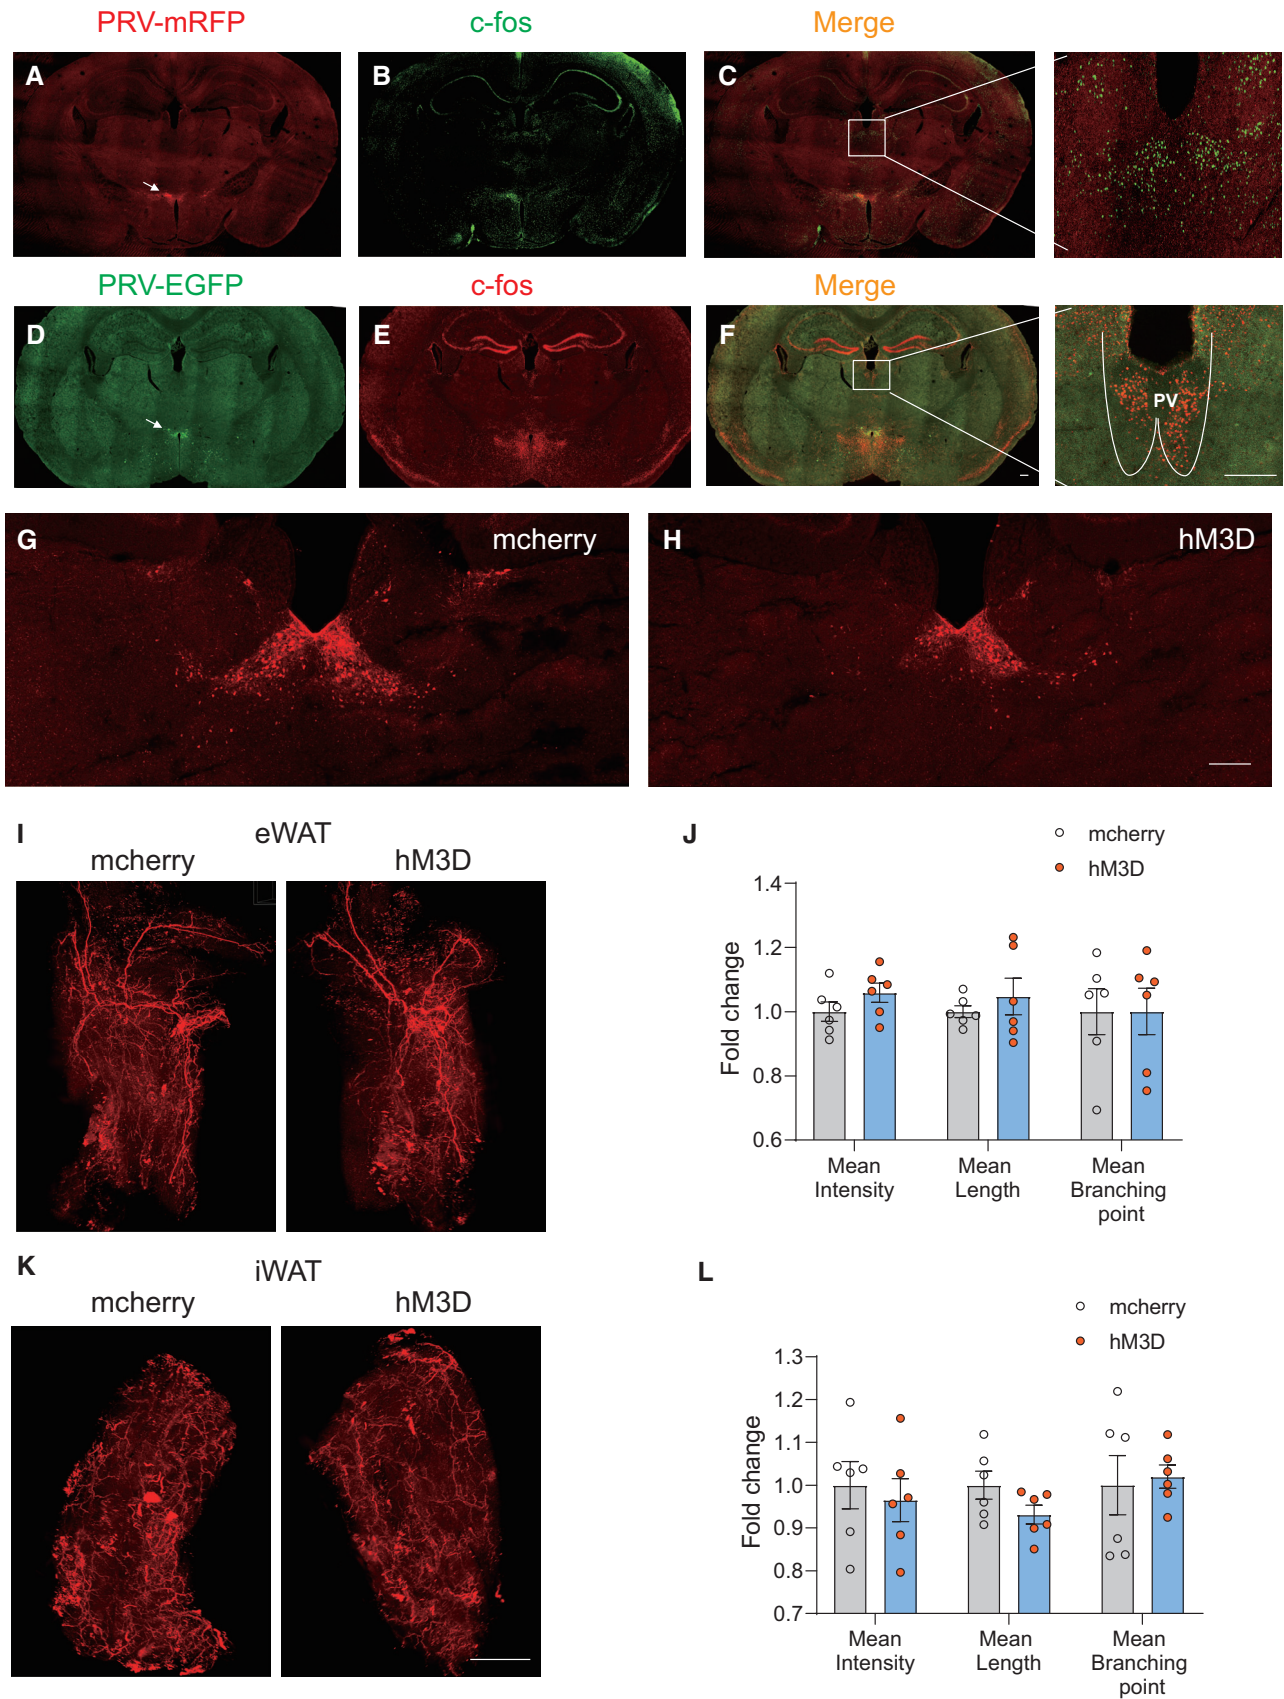

Figure EV3.

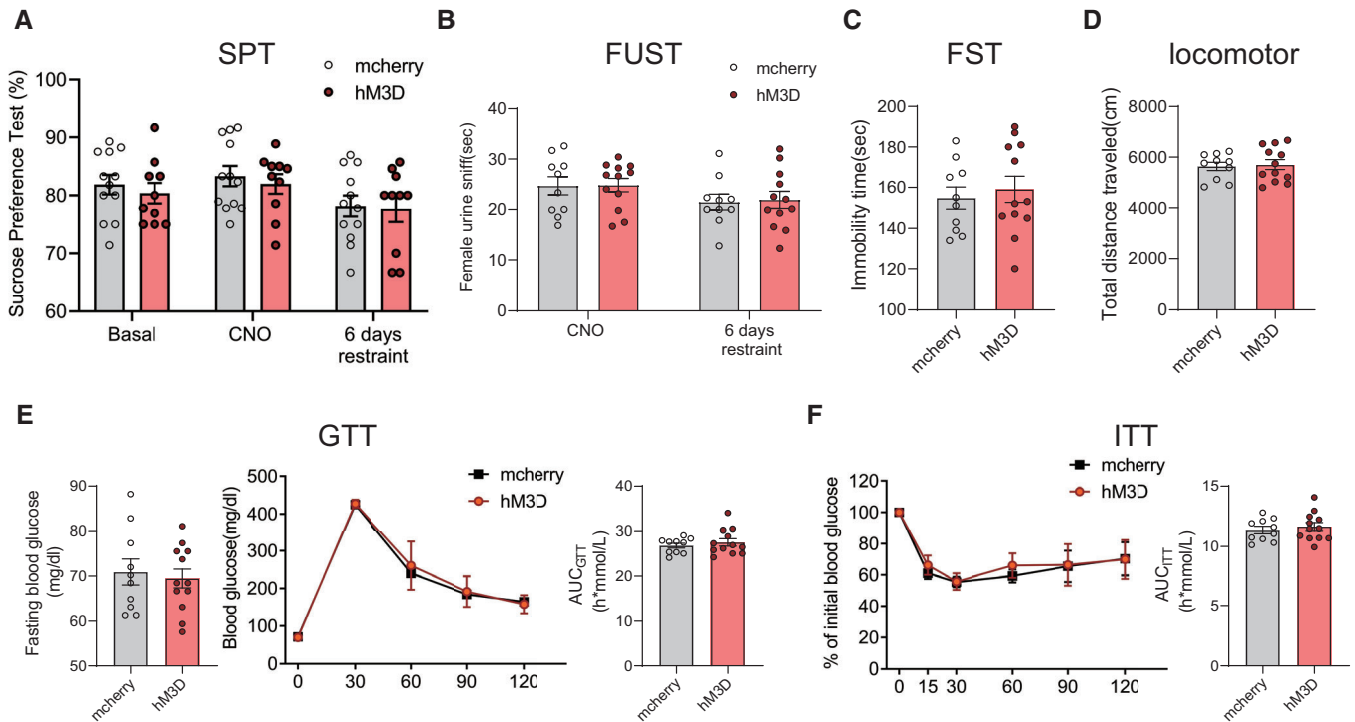

**Figure EV4. Chronic activation of the PV neurons responding to restraint stress did not affect depressive-like behaviours or insulin resistance.**

A–D Chronically reactivating hM3D-labelled PV neurons did not affect the depressive-like behaviours, as evaluated by SPT (A, subgroups,  $F_{(1, 20)} = 0.8020$ ,  $P = 0.3812$ ; treatment,  $F_{(2, 40)} = 2.940$ ,  $P = 0.0644$ ; subgroups  $\times$  treatment,  $F_{(2, 40)} = 0.03915$ ,  $P = 0.9616$ ), FUST (B, subgroups,  $F_{(1, 20)} = 0.04271$ ,  $P = 0.8384$ ; treatment,  $F_{(1, 20)} = 2.907$ ,  $P = 0.1037$ ; subgroups  $\times$  treatment,  $F_{(1, 20)} = 0.007554$ ,  $P = 0.9316$ ) and FST (C, two-tailed unpaired  $t$ -test,  $t_{(20)} = 0.4940$ ,  $P = 0.6267$ ) and the locomotor activity (D, two-tailed unpaired  $t$ -test,  $t_{(20)} = 0.2734$ ,  $P = 0.7874$ ).

E, F Chronically reactivating hM3D-labelled PV neurons did not induce insulin resistance evaluated by GTT (E, left, fasting blood glucose level, two-tailed unpaired  $t$ -test,  $t_{(20)} = 0.4146$ ,  $P = 0.6829$ ; middle, glucose tolerance test, subgroups,  $F_{(1, 20)} = 0.2836$ ,  $P = 0.6002$ ; time,  $F_{(4, 80)} = 497.7$ ,  $P < 0.0001$ ; subgroups  $\times$  treatment,  $F_{(4, 80)} = 0.7470$ ,  $P = 0.5629$ ; right, the area under the curve of GTT, two-tailed unpaired  $t$ -test,  $t_{(20)} = 0.7050$ ,  $P = 0.4889$ ) and ITT (F, left, subgroups,  $F_{(1, 20)} = 0.8558$ ,  $P = 0.3659$ ; time,  $F_{(5, 100)} = 131.8$ ,  $P < 0.0001$ ; subgroups  $\times$  treatment,  $F_{(5, 100)} = 1.249$ ,  $P = 0.2923$ ; right, the area under the curve of ITT, two-tailed unpaired  $t$ -test with Welch's correction,  $t_{(20)} = 0.5915$ ,  $P = 0.5608$ ).

Data information: mcherry group  $n = 10$ , hM3D group  $n = 12$  in (A–F). Shapiro–Wilk test and  $F$ -test were used to test the normality and equal variance assumptions, respectively. Two-tailed  $t$ -tests were performed to assess differences between two experimental groups with normally distributed data and equal variance. Two-tailed  $t$ -tests with Welch's correction were used when a two-sample comparison of means with unequal variances. For non-normally distributed data, Mann–Whitney  $U$ -tests were performed to compare two groups. For multiple groups, two-way ANOVAs followed by Sidak multiple comparisons test were used.  $P < 0.05$  was considered statistically significant. Data are presented as means  $\pm$  SEM.

Source data are available online for this figure.

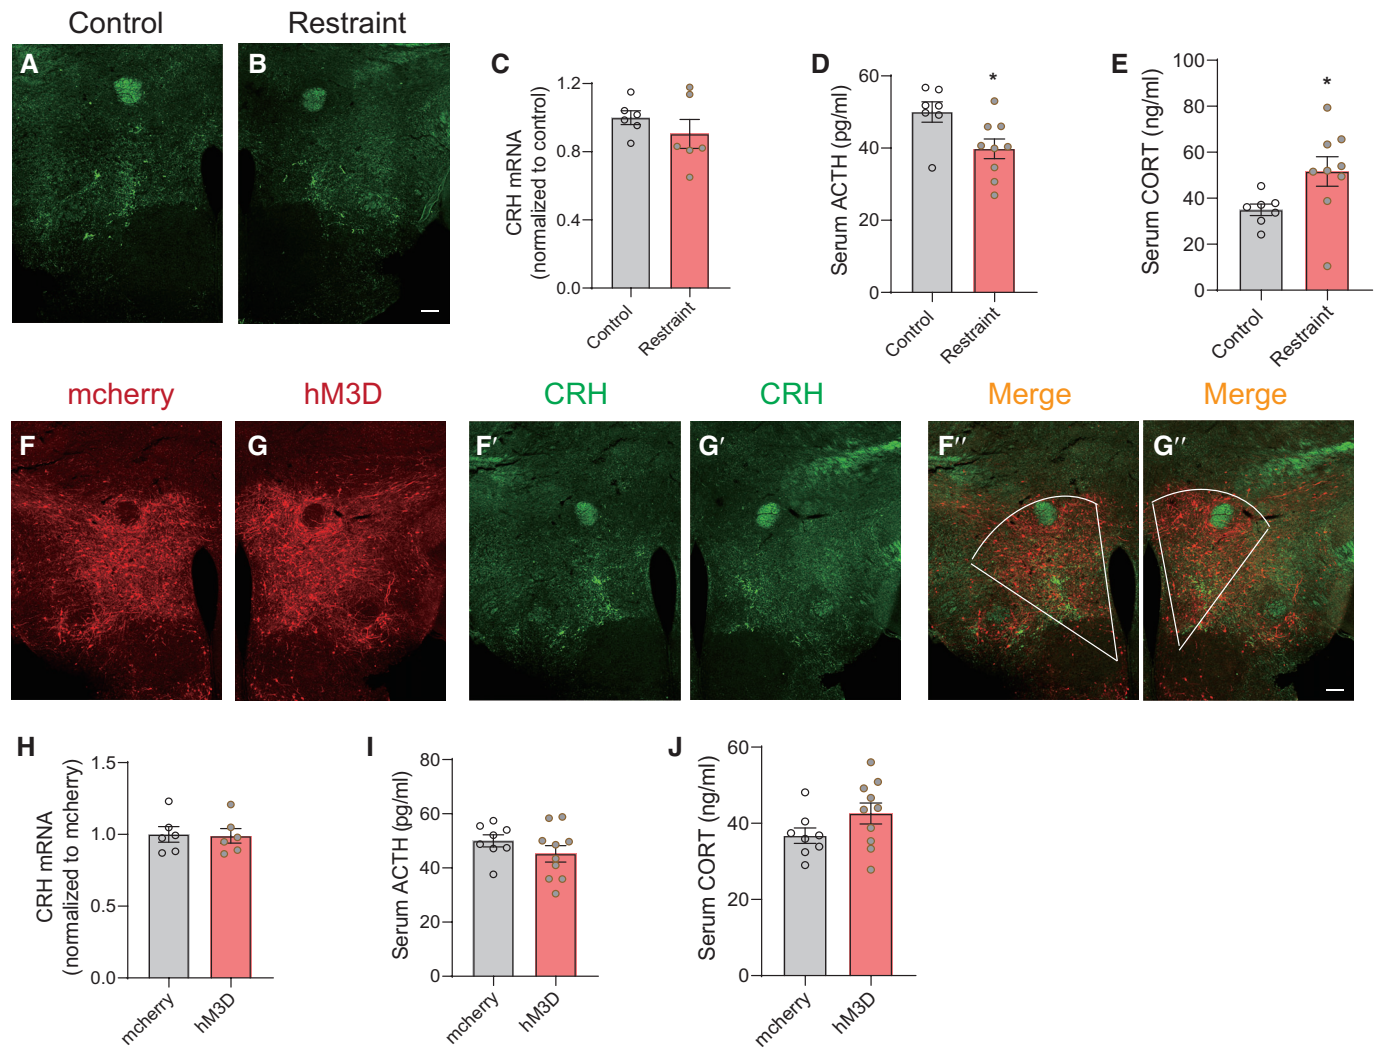

Supplement: EMBR-24-e57176-s003.pdf [file EMBR-24-e57176-s003.pdf]
